# Supplementary material for: Pressure-induced high-temperature superconductivity in ternary Y–Zr–H compounds
Source: Royal Society of Chemistry journal article supplement (doi:10.1039/d2cp05850b), 2023-01-01
Supplement: d2cp05850b1.pdf [file d2cp05850b1.pdf]

## Supplementary Material

For

### Pressure-induced high-temperature superconductivity in ternary Y-Zr-H compounds

Wendi Zhao,<sup>1</sup> Hao Song\*,<sup>1</sup> Mingyang Du<sup>2</sup>, Qiwen Jiang<sup>2</sup>, Tiancheng Ma<sup>2</sup>, Ming Xu<sup>1</sup>, Defang Duan,<sup>2,\*</sup> and Tian Cui<sup>1,2,\*</sup>

<sup>1</sup>*Institute of High Pressure Physics, School of Physical Science and Technology, Ningbo University, Ningbo 315211, China*

<sup>2</sup>*State Key Laboratory of Superhard Materials, College of Physics, Jilin University, Changchun 130012, China*

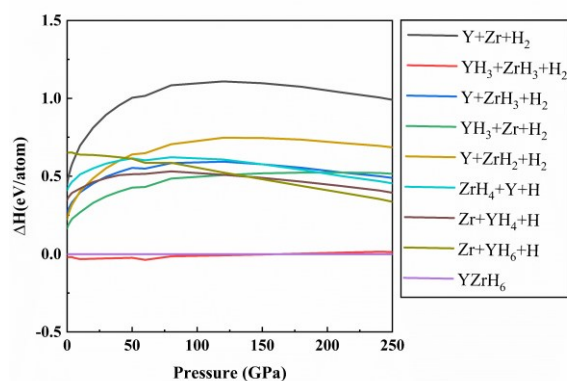

Fig.S1 The enthalpy difference curves with respect to  $\text{YZrH}_6$  from divergent synthetic routes as a function of pressure.

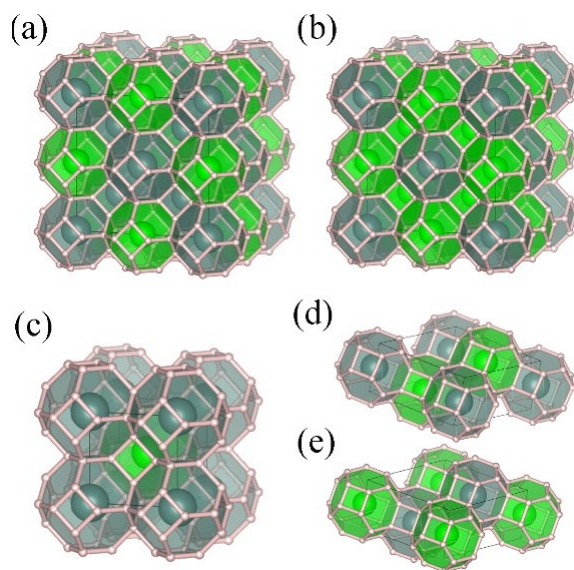

Fig.S2 Predicted crystal structure of clathrate hexahydrides at 200 GPa. (a)  $Fm\bar{3}m$ - $Y_3ZrH_{24}$ , (b)  $Fm\bar{3}m$ - $YZr_3H_{24}$ , (c)  $Pm\bar{3}m$ - $YZrH_{12}$ , (d)  $P\bar{3}m1$ - $YZr_2H_{18}$  and (e)  $P\bar{3}m1$ - $Y_2ZrH_{18}$ . The gray, green and pink spheres represent Y, Zr and H atoms, respectively.

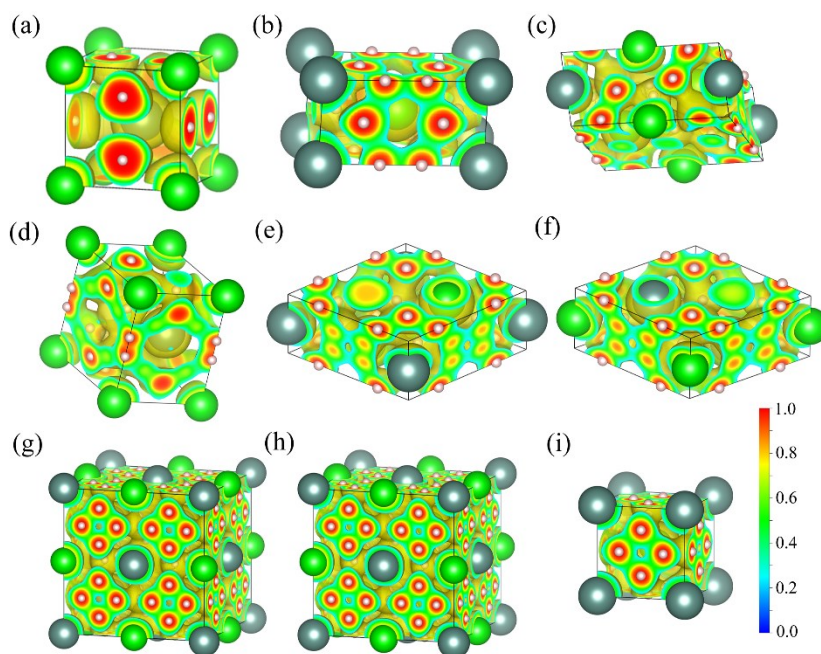

Fig.S3 The electron localization functions. (a)  $Pm\bar{3}$ - $YZrH_6$  at 1 atm and (b)  $P4/mmm$ - $YZrH_8$ , (c)  $P2/m$ - $YZr_3H_{16}$  (d)  $P\bar{6}m2$ - $YZrH_{18}$  (e)  $P\bar{3}m1$ - $YZr_2H_{18}$  (f)  $P\bar{3}m1$ - $Y_2ZrH_{18}$  (g)  $Fm\bar{3}m$ - $Y_3ZrH_{24}$  (h)  $Fm\bar{3}m$ - $YZr_3H_{24}$  (i)  $Pm\bar{3}m$ - $YZrH_{12}$  at 200 GPa. Isosurface values are all set to 0.3.

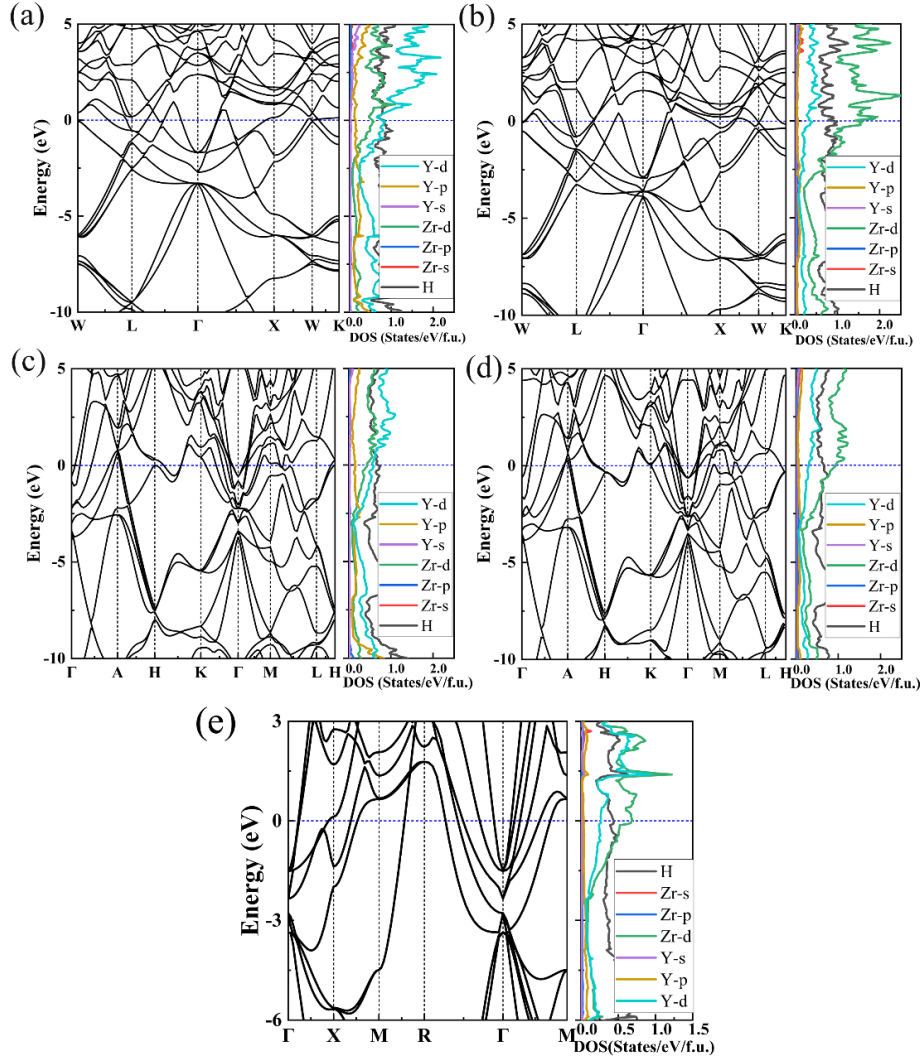

Fig. S4 Calculated electronic band structures and atom-projected density of states for (a)  $Fm\bar{3}m$ - $Y_3ZrH_{24}$ , (b)  $Fm\bar{3}m$ - $YZr_3H_{24}$ , (c)  $P\bar{3}m1$ - $Y_2ZrH_{18}$ , (d)  $P\bar{3}m1$ - $YZr_2H_{18}$  at 200 GPa, and (e)  $Pm\bar{3}m$ - $YZrH_{12}$  at 160 GPa. The Fermi level is set to zero.

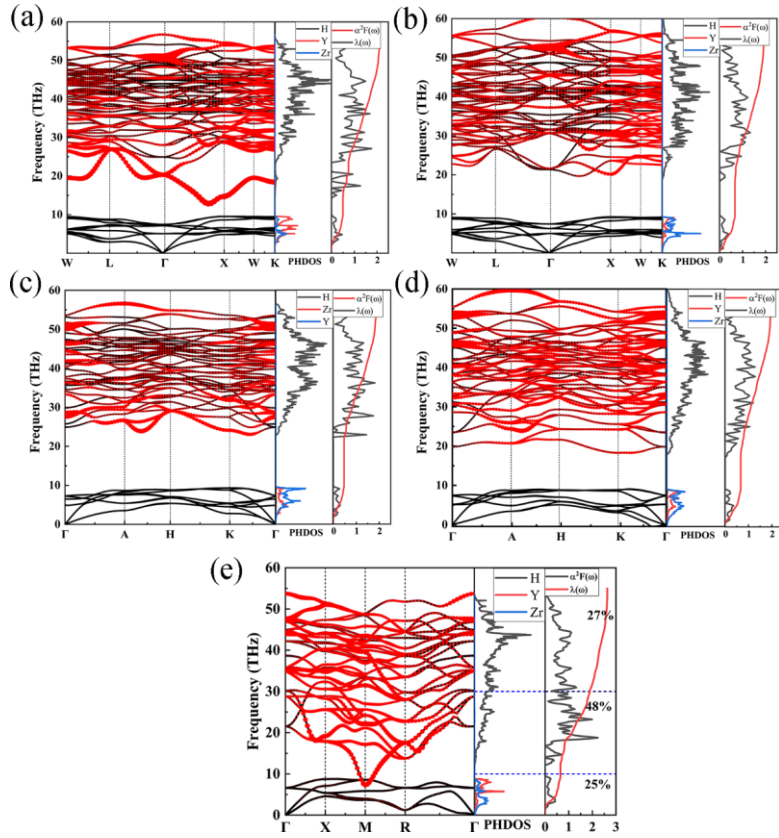

Fig. S5 Calculated phonon dispersion curves, projected phonon density of states (PHDOS), and Eliashberg spectral function  $a^2F(\omega)$  together with the electron-phonon integral  $\lambda(\omega)$  for (a)  $Fm\bar{3}m$ - $Y_3ZrH_{24}$  (b)  $Fm\bar{3}m$ - $YZr_3H_{24}$ , (c)  $P\bar{3}m1$ - $Y_2ZrH_{18}$ , (d)  $P\bar{3}m1$ - $YZr_2H_{18}$  at 200 GPa and (e)  $Pm\bar{3}m$ - $YZrH_{12}$  at 160 GPa. The size of the red solid dots in the phonon spectra is proportional to the strength of electron-phonon coupling.

Table S1. Structural information of predicted hydrides.

| Structure                        | Lattice parameters (Å)         |     | Atomic coordinates |         |         | Sites |
|----------------------------------|--------------------------------|-----|--------------------|---------|---------|-------|
| $Pm\bar{3}$                      |                                | H1  | 0.2367             | 0.0000  | 0.5000  | 6f    |
| YZrH <sub>6</sub>                | a=b=c=3.9768                   | Y1  | 0.5000             | 0.5000  | 0.5000  | 1b    |
| 1 atm                            | $\alpha = \beta = \gamma = 90$ | Zr1 | 0.0000             | 0.0000  | 0.0000  | 1a    |
| P4/mmm                           |                                | H1  | 0.0000             | 0.5000  | 0.2588  | 4i    |
| YZrH <sub>8</sub>                | a=b= 2.6855                    | H2  | 0.0000             | 0.0000  | 0.3730  | 2g    |
| 200 GPa                          | c=5.0677                       | H3  | 0.5000             | 0.5000  | 0.1310  | 2h    |
|                                  | $\alpha = \beta = \gamma = 90$ | Y1  | 0.0000             | 0.0000  | 0.0000  | 1a    |
|                                  |                                | Zr1 | 0.5000             | 0.5000  | 0.5000  | 1d    |
|                                  | a=3.1472                       | H1  | 0.2460             | 0.2558  | 0.7449  | 4o    |
|                                  | b=3.8042                       | H2  | 0.0000             | 0.25814 | 0.0000  | 2i    |
| $P2/m$                           | c=6.1948                       | H3  | 0.0638             | 0.0000  | 0.1928  | 2m    |
| YZr <sub>3</sub> H <sub>16</sub> | $\alpha = 90$                  | H4  | 0.4422             | 0.0000  | 0.3181  | 2m    |
| 200 GPa                          | $\beta = 103.34$               | H5  | 0.1913             | 0.5000  | 0.5587  | 2n    |
|                                  | $\gamma = 90$                  | H6  | 0.3095             | 0.5000  | 0.9324  | 2n    |
|                                  |                                | Zr1 | 0.2525             | 0.5000  | 0.2514  | 2n    |
|                                  |                                | H7  | 0.5000             | 0.2501  | 0.5000  | 2l    |
|                                  |                                | Y1  | 0.5000             | 0.0000  | 0.0000  | 1d    |
|                                  |                                | Zr2 | 0.0000             | 0.0000  | 0.5000  | 1c    |
|                                  | a=3.3872                       | H1  | 0.8226             | 0.6451  | 0.3019  | 6n    |
|                                  | b=3.3872                       | H2  | 0.0000             | 0.0000  | 0.4123  | 2g    |
|                                  | c=5.1842                       | H3  | 0.6667             | 0.3333  | 0.5000  | 1f    |
| $P\bar{6}m2$                     | $\alpha = 90$                  | H4  | 0.9782             | 0.4891  | 0.8170  | 6n    |
| YZrH <sub>18</sub>               | $\beta = 90$                   | H5  | 0.3333             | 0.6667  | 0.8908  | 2h    |
| 200 GPa                          | $\gamma = 120$                 | H6  | 0.6667             | 0.3333  | 0.0000  | 1e    |
|                                  |                                | Y1  | 0.3333             | 0.6667  | 0.5000  | 1d    |
|                                  |                                | Zr1 | 0.0000             | 0.0000  | 0.0000  | 1a    |
| $Fm\bar{3}m$                     |                                | H1  | 0.2504             | -0.5000 | -0.3741 | 96j   |
| Y <sub>3</sub> ZrH <sub>24</sub> | a=b=c=6.9907                   | Zr1 | 0.5000             | -0.5000 | -0.5000 | 4b    |
| 200 GPa                          | $\alpha = \beta = \gamma = 90$ | Y1  | 0.2500             | -0.2500 | -0.2500 | 8c    |
|                                  |                                | Y2  | 0.0000             | 0.0000  | 0.0000  | 4a    |
| $Fm\bar{3}m$                     |                                | H1  | 0.5000             | 0.2507  | 0.3754  | 96j   |
| YZr <sub>3</sub> H <sub>24</sub> | a=b=c=6.6703                   | Zr1 | 0.2500             | 0.2500  | 0.2500  | 8c    |
| 200 GPa                          | $\alpha = \beta = \gamma = 90$ | Zr2 | 0.5000             | 0.5000  | 0.5000  | 4b    |
|                                  |                                | Y1  | 0.0000             | 0.0000  | 0.0000  | 4a    |
| $P\bar{3}m1$                     | a=4.6782                       | H1  | 0.5864             | 0.9196  | 0.6713  | 12j   |
| Y <sub>2</sub> ZrH <sub>18</sub> | b=4.6782                       | H2  | 0.7534             | 0.7534  | -0.0000 | 6g    |
| 200 GPa                          | c=2.8418                       | Zr1 | -0.000             | 0.0000  | 0.5000  | 1b    |
|                                  | $\alpha = \beta = 90$          | Y1  | 0.6667             | 0.3333  | 0.8273  | 2d    |
|                                  | $\gamma = 120$                 |     |                    |         |         |       |

|                                  |                                |     |        |         |        |     |
|----------------------------------|--------------------------------|-----|--------|---------|--------|-----|
| $P\bar{3}m1$                     | a=4.6681                       | H1  | 0.5813 | 0.9148  | 0.6569 | 12j |
| YZr <sub>2</sub> H <sub>18</sub> | b=4.6681                       | H2  | 0.7447 | 0.7447  | 0.0000 | 6g  |
| 200 GPa                          | c=2.8215                       | Zr1 | 0.6667 | 0.3333  | 0.8491 | 2d  |
|                                  | $\alpha = \beta = 90$          | Y1  | 0.0000 | 0.0000  | 0.5000 | 1b  |
|                                  | $\gamma = 120$                 |     |        |         |        |     |
| $Pm\bar{3}m$                     |                                | H1  | 0.5000 | -0.0000 | 0.7525 | 12h |
| YZrH <sub>12</sub>               | a=b=c=3.4831                   | Y1  | 0.0000 | 0.0000  | 0.0000 | 1a  |
| 200 GPa                          | $\alpha = \beta = \gamma = 90$ | Zr1 | 0.5000 | 0.5000  | 0.5000 | 1b  |

Table S2. The average charge value ( $e$ ) and number of electrons transferred  $\delta(e)$  for different atoms in hexahydrides of the Y-Zr-H system at 200 GPa.

| Structure                                     | Atom | Charge Value | $\delta(e)$ |
|-----------------------------------------------|------|--------------|-------------|
| $Fm\bar{3}m$ Y <sub>3</sub> ZrH <sub>24</sub> | Y    | 9.611        | 1.389       |
|                                               | Zr   | 9.023        | 0.977       |
|                                               | H    | 1.214        | -0.214      |
| $Fm\bar{3}m$ YZr <sub>3</sub> H <sub>24</sub> | Y    | 9.622        | 1.378       |
|                                               | Zr   | 10.483       | 1.517       |
|                                               | H    | 1.236        | -0.236      |
| $P\bar{3}m1$ Y <sub>2</sub> ZrH <sub>18</sub> | Y    | 9.776        | 1.224       |
|                                               | Zr   | 10.592       | 1.408       |
|                                               | H    | 1.213        | -0.214      |
| $P\bar{3}m1$ YZr <sub>2</sub> H <sub>18</sub> | Y    | 9.792        | 1.208       |
|                                               | Zr   | 10.656       | 1.344       |
|                                               | H    | 1.216        | -0.216      |
| $Pm\bar{3}m$ YZrH <sub>12</sub>               | Y    | 9.638        | 1.362       |
|                                               | Zr   | 10.550       | 1.450       |
|                                               | H    | 1.233        | -0.234      |

Table S3. The calculated EPC parameter  $\lambda$ , logarithmic average phonon frequency  $\omega_{log}$  (K), electronic density of states at Fermi level  $N_{ef}$  (states/spin/eV/f.u.).  $T_c$  values were estimated by the Allen-Dynes modified McMillan equation.

| Structure                        | Space group  | Pressure (GPa) | $\lambda$ | $\omega_{log}$ | $N_{ef}$ | $T_c$ (K) |        |
|----------------------------------|--------------|----------------|-----------|----------------|----------|-----------|--------|
|                                  |              |                |           |                |          | 0.1       | 0.13   |
| YZrH <sub>6</sub>                | $Pm\bar{3}$  | 1 atm          | 0.72      | 422.94         | 0.69     | 16.30     | 12.55  |
| YZrH <sub>8</sub>                | $P4/mmm$     | 200            | 1.05      | 866.54         | 0.47     | 69.88     | 59.88  |
| YZr <sub>3</sub> H <sub>16</sub> | $P2/m$       | 200            | 0.73      | 973.59         | 1.00     | 38.59     | 29.87  |
| YZrH <sub>18</sub>               | $P\bar{6}m2$ | 200            | 2.21      | 794.923        | 0.58     | 156.23    | 142.12 |
| Y <sub>3</sub> ZrH <sub>24</sub> | $Fm\bar{3}m$ | 200            | 2.13      | 992.67         | 1.42     | 184.92    | 168.62 |
| Y <sub>2</sub> ZrH <sub>18</sub> | $P\bar{3}m1$ | 200            | 1.88      | 1025.28        | 1.11     | 169.70    | 154.04 |
| YZrH <sub>12</sub>               | $Pm\bar{3}m$ | 160            | 2.63      | 803.46         | 0.85     | 182.67    | 167.06 |
|                                  |              | 200            | 2.16      | 920.97         | 0.81     | 174.56    | 159.11 |
|                                  |              | 300            | 1.70      | 1087.95        | 0.75     | 162.93    | 147.08 |
| YZr <sub>2</sub> H <sub>18</sub> | $P\bar{3}m1$ | 200            | 1.98      | 775.73         | 1.24     | 136.68    | 123.97 |
|                                  |              | 200            | 1.95      | 748.76         | 1.73     | 130.52    | 118.31 |
| YZr <sub>3</sub> H <sub>24</sub> | $Fm\bar{3}m$ | 250            | 1.70      | 864.58         | 1.65     | 129.81    | 117.02 |
|                                  |              | 300            | 1.57      | 924.35         | 1.59     | 127.57    | 114.47 |
